# Supplementary material for: Planar vs. three-dimensional X62−, X2Y42−, and X3Y32− (X, Y = B, Al, Ga) metal clusters: an analysis of their relative energies through the turn-upside-down approach
Source: Royal Society of Chemistry journal article supplement (doi:10.1039/c6cp01109h), 2016-01-01
Supplement: c6cp01109h1.pdf [file c6cp01109h1.pdf]

## SUPPORTING INFORMATION

### **Planar vs. three-dimensional $X_6^{2-}$ , $X_2Y_4^{2-}$ , and $X_3Y_3^{2-}$ (X, Y = B, Al, Ga) metal clusters. An analysis of the isomerisation energies through the turn-upside-down approach**

Ouissam El-Bakouri,<sup>a</sup> Miquel Solà,<sup>\*a</sup> and Jordi Poater<sup>\*b,c,d</sup>

<sup>a</sup> *Institut de Química Computacional i Catàlisi (IQCC) and Departament de Química, Universitat de Girona, Campus Montilivi, 17071 Girona, Catalonia Spain*

<sup>b</sup> *Departament de Química Orgànica, Universitat de Barcelona, Martí i Franquès 1-11, 08028 Barcelona, Catalonia, Spain. E-mail: jordi.poater@gmail.com*

<sup>c</sup> *Department of Theoretical Chemistry and Amsterdam Center for Multiscale Modeling, Vrije Universiteit Amsterdam, De Boeleaan 1083, NL-1081HV Amsterdam, The Netherlands*

<sup>d</sup> *Institució Catalana de Recerca i Estudis Avançats (ICREA), Pg. Lluís Companys, 08010 Barcelona, Catalonia, Spain*

**Table S1.** Cartesian coordinates of all systems analysed.

**Table S2.** Energy decomposition analysis (EDA) of  $B_6^{2-}$  metal cluster with  $D_{2h}$  and  $O_h$  symmetries (in kcal mol<sup>-1</sup>), from two  $B_3^-$  fragments at their quintuplet state, computed at the BLYP-D3(BJ)/TZ2P level.

**Table S3.** Energy decomposition analysis (EDA) of  $Al_6^{2-}$  metal cluster with  $D_{2h}$  and  $O_h$  symmetries (in kcal mol<sup>-1</sup>), from two  $Al_3^-$  fragments at their quintuplet state, computed at the BLYP-D3(BJ)/TZ2P level.

**Table S4.** Energy decomposition analysis (EDA) of  $Ga_6^{2-}$  metal cluster with  $D_{2h}$  and  $O_h$  symmetries (in kcal mol<sup>-1</sup>), from two  $Ga_3^-$  fragments at their quintuplet state, computed at the BLYP-D3(BJ)/TZ2P level.

**Table S5.** Energy decomposition analysis (EDA) of  $B_6^{2-}$  metal cluster with  $D_{2h}$  and  $O_h$  symmetries (in kcal mol<sup>-1</sup>), from two  $B_3^-$  fragments at their triplet state, computed at the BLYP-D3(BJ)/TZ2P level.

**Table S1.** Cartesian coordinates of all systems analysed.

|                         |           |           |          |                      |           |           |           |
|-------------------------|-----------|-----------|----------|----------------------|-----------|-----------|-----------|
| $B_6^{2-}(D_{2h})$      |           |           |          | $B_6^{2-}(O_h)$      |           |           |           |
| B                       | -0.890490 | -0.830846 | 0.000000 | B                    | 0.000000  | 0.000000  | 1.249985  |
| B                       | 0.000000  | -2.082890 | 0.000000 | B                    | 0.000000  | 1.249985  | 0.000000  |
| B                       | 0.890490  | -0.830846 | 0.000000 | B                    | 0.000000  | 0.000000  | -1.249985 |
| B                       | -0.890490 | 0.830846  | 0.000000 | B                    | 0.000000  | -1.249985 | 0.000000  |
| B                       | 0.890490  | 0.830846  | 0.000000 | B                    | -1.249985 | 0.000000  | 0.000000  |
| B                       | 0.000000  | 2.082890  | 0.000000 | B                    | 1.249985  | 0.000000  | 0.000000  |
| $Al_6^{2-}(D_{2h})$     |           |           |          | $Al_6^{2-}(O_h)$     |           |           |           |
| Al                      | -1.437928 | -1.286828 | 0.000000 | Al                   | 0.000000  | 0.000000  | 1.941805  |
| Al                      | 0.000000  | -3.819606 | 0.000000 | Al                   | 0.000000  | 1.941805  | 0.000000  |
| Al                      | 1.437928  | -1.286828 | 0.000000 | Al                   | 0.000000  | 0.000000  | -1.941805 |
| Al                      | -1.437928 | 1.286828  | 0.000000 | Al                   | 0.000000  | -1.941805 | 0.000000  |
| Al                      | 1.437928  | 1.286828  | 0.000000 | Al                   | -1.941805 | 0.000000  | 0.000000  |
| Al                      | 0.000000  | 3.819606  | 0.000000 | Al                   | 1.941805  | 0.000000  | 0.000000  |
| $Ga_6^{2-}(D_{2h})$     |           |           |          | $Ga_6^{2-}(O_h)$     |           |           |           |
| Ga                      | -1.415706 | -1.263017 | 0.000000 | Ga                   | 0.000000  | 0.000000  | 1.950378  |
| Ga                      | 0.000000  | -3.791914 | 0.000000 | Ga                   | 0.000000  | 1.950378  | 0.000000  |
| Ga                      | 1.415706  | -1.263017 | 0.000000 | Ga                   | 0.000000  | 0.000000  | -1.950378 |
| Ga                      | -1.415706 | 1.263017  | 0.000000 | Ga                   | 0.000000  | -1.950378 | 0.000000  |
| Ga                      | 1.415706  | 1.263017  | 0.000000 | Ga                   | -1.950378 | 0.000000  | 0.000000  |
| Ga                      | 0.000000  | 3.791914  | 0.000000 | Ga                   | 1.950378  | 0.000000  | 0.000000  |
| $B_2Al_4^{2-}(D_{2h})$  |           |           |          | $B_2Al_4^{2-}(O_h)$  |           |           |           |
| Al                      | -1.377132 | -1.351418 | 0.000000 | B                    | 0.000000  | 1.304474  | 0.000000  |
| B                       | 0.000000  | -2.890830 | 0.000000 | Al                   | 0.000000  | 0.000000  | -1.735715 |
| Al                      | 1.377132  | -1.351418 | 0.000000 | B                    | 0.000000  | -1.304474 | 0.000000  |
| Al                      | -1.377132 | 1.351418  | 0.000000 | Al                   | 0.000000  | 0.000000  | 1.735715  |
| Al                      | 1.377132  | 1.351418  | 0.000000 | B                    | -1.304474 | 0.000000  | 0.000000  |
| B                       | 0.000000  | 2.890830  | 0.000000 | B                    | 1.304474  | 0.000000  | 0.000000  |
| $Al_2B_4^{2-}(D_{2h})$  |           |           |          | $Al_2B_4^{2-}(O_h)$  |           |           |           |
| B                       | -0.897799 | -0.785648 | 0.000000 | Al                   | 0.000000  | 1.802815  | 0.000000  |
| Al                      | 0.000000  | -2.763150 | 0.000000 | B                    | 0.000000  | 0.000000  | -1.455322 |
| B                       | 0.897799  | -0.785648 | 0.000000 | Al                   | 0.000000  | -1.802815 | 0.000000  |
| B                       | -0.897799 | 0.785648  | 0.000000 | B                    | 0.000000  | 0.000000  | 1.455322  |
| B                       | 0.897799  | 0.785648  | 0.000000 | Al                   | -1.802815 | 0.000000  | 0.000000  |
| Al                      | 0.000000  | 2.763150  | 0.000000 | Al                   | 1.802815  | 0.000000  | 0.000000  |
| $Al_2Ga_4^{2-}(D_{2h})$ |           |           |          | $Al_2Ga_4^{2-}(O_h)$ |           |           |           |
| Ga                      | -1.425711 | -1.256714 | 0.000000 | Ga                   | 0.000000  | 1.936152  | 0.000000  |
| Al                      | 0.000000  | -3.754547 | 0.000000 | Al                   | 0.000000  | 0.000000  | -1.950434 |
| Ga                      | 1.425711  | -1.256714 | 0.000000 | Ga                   | 0.000000  | -1.936152 | 0.000000  |
| Ga                      | -1.425711 | 1.256714  | 0.000000 | Al                   | 0.000000  | 0.000000  | 1.950434  |
| Ga                      | 1.425711  | 1.256714  | 0.000000 | Ga                   | -1.936152 | 0.000000  | 0.000000  |
| Al                      | 0.000000  | 3.754547  | 0.000000 | Ga                   | 1.936152  | 0.000000  | 0.000000  |

|                                               |           |           |           |                                               |           |           |           |
|-----------------------------------------------|-----------|-----------|-----------|-----------------------------------------------|-----------|-----------|-----------|
| $\text{Ga}_2\text{Al}_4^{2-} (\text{D}_{2h})$ |           |           |           | $\text{Ga}_2\text{Al}_4^{2-} (\text{O}_{2h})$ |           |           |           |
| Al                                            | -1.428358 | -1.293707 | 0.000000  | Al                                            | 0.000000  | 1.949081  | 0.000000  |
| Ga                                            | 0.000000  | -3.835594 | 0.000000  | Ga                                            | 0.000000  | 0.000000  | -1.912150 |
| Al                                            | 1.428358  | -1.293707 | 0.000000  | Al                                            | 0.000000  | -1.949081 | 0.000000  |
| Al                                            | -1.428358 | 1.293707  | 0.000000  | Ga                                            | 0.000000  | 0.000000  | 1.912150  |
| Al                                            | 1.428358  | 1.293707  | 0.000000  | Al                                            | -1.949081 | 0.000000  | 0.000000  |
| Ga                                            | 0.000000  | 3.835594  | 0.000000  | Al                                            | 1.949081  | 0.000000  | 0.000000  |
| $\text{Ga}_2\text{B}_4^{2-} (\text{D}_{2h})$  |           |           |           | $\text{Ga}_2\text{B}_4^{2-} (\text{O}_h)$     |           |           |           |
| B                                             | -0.891736 | -0.787322 | 0.000000  | B                                             | 0.000000  | 1.323781  | 0.000000  |
| Ga                                            | 0.000000  | -2.828659 | 0.000000  | Ga                                            | 0.000000  | 0.000000  | -1.766260 |
| B                                             | 0.891736  | -0.787322 | 0.000000  | B                                             | 0.000000  | -1.323781 | 0.000000  |
| B                                             | -0.891736 | 0.787322  | 0.000000  | Ga                                            | 0.000000  | 0.000000  | 1.766260  |
| B                                             | 0.891736  | 0.787322  | 0.000000  | B                                             | -1.323781 | 0.000000  | 0.000000  |
| Ga                                            | 0.000000  | 2.828659  | 0.000000  | B                                             | 1.323781  | 0.000000  | 0.000000  |
| $\text{Al}_3\text{Ga}_3^{2-} (\text{D}_{2h})$ |           |           |           | $\text{Al}_3\text{Ga}_3^{2-} (\text{O}_h)$    |           |           |           |
| Ga                                            | 0.000000  | -1.431932 | 1.229977  | Al                                            | 1.580083  | 0.000000  | 1.112352  |
| Ga                                            | 0.000000  | 0.000000  | 3.727810  | Al                                            | -0.790042 | 1.368392  | 1.112352  |
| Ga                                            | 0.000000  | 1.431932  | 1.229977  | Ga                                            | -1.600688 | 0.000000  | -1.117676 |
| Al                                            | 0.000000  | -1.421171 | -1.309089 | Ga                                            | 0.800344  | -1.386237 | -1.117676 |
| Al                                            | 0.000000  | 1.421171  | -1.309089 | Al                                            | -0.790042 | -1.368392 | 1.112352  |
| Al                                            | 0.000000  | 0.000000  | -3.874624 | Ga                                            | 0.800344  | 1.386237  | -1.117676 |

**Table S2.** Energy decomposition analysis (EDA) of  $B_6^{2-}$  metal cluster with  $D_{2h}$  and  $O_h$  symmetries (in kcal mol<sup>-1</sup>), from two  $B_3^-$  fragments at their quintuplet state, computed at the BLYP-D3(BJ)/TZ2P level.

| $B_6^{2-}$                 | $D_{2h} +$<br>$D_{2h}$<br>$\rightarrow D_{2h}$ | $O_h + O_h$<br>$\rightarrow O_h$ | $\Delta E$<br>$D_{2h} - O_h$ | $O_h + O_h$<br>$\rightarrow D_{2h}$ | $\Delta E$<br>$D_{2h}$ | $D_{2h} +$<br>$D_{2h} \rightarrow O_h$ | $\Delta E$<br>$O_h$ |
|----------------------------|------------------------------------------------|----------------------------------|------------------------------|-------------------------------------|------------------------|----------------------------------------|---------------------|
| $\Delta E_{\text{int}}$    | -192.0                                         | -101.4                           | -90.6                        | -125.3                              | 66.7                   | -81.2                                  | 20.2                |
| $\Delta E_{\text{Pauli}}$  | 533.5                                          | 735.3                            | -201.8                       | 519.1                               | -14.4                  | 724.4                                  | -10.9               |
| $\Delta V_{\text{elstat}}$ | -239.0                                         | -291.9                           | 52.9                         | -206.1                              | 32.9                   | -286.2                                 | 5.7                 |
| $\Delta E_{\text{oi}}$     | -483.4                                         | -542.8                           | 59.4                         | -435.6                              | 47.8                   | -516.6                                 | 26.2                |
| $\Delta E_{\text{disp}}$   | -3.2                                           | -2.1                             | -1.1                         | -2.7                                | 0.5                    | -1.9                                   | 0.2                 |
| $\Delta E_{\text{prep}}$   | 12.5                                           | 1.3                              | 11.2                         | 1.3                                 | -11.2                  | 12.5                                   | 11.2                |
| $\Delta E$                 | -179.5                                         | -100.2                           | -79.3                        | -124.0                              | 55.5                   | -68.7                                  | 31.5                |

**Table S3.** Energy decomposition analysis (EDA) of  $\text{Al}_6^{2-}$  metal cluster with  $D_{2h}$  and  $O_h$  symmetries (in  $\text{kcal mol}^{-1}$ ), from two  $\text{Al}_3^-$  fragments at their quintuplet state, computed at the BLYP-D3(BJ)/TZ2P level.

| $\text{Al}_6^{2-}$         | $D_{2h} + D_{2h}$<br>$\rightarrow D_{2h}$ | $O_h + O_h$<br>$\rightarrow O_h$ | $\Delta E$<br>$D_{2h} - O_h$ | $O_h + O_h$<br>$\rightarrow D_{2h}$ | $\Delta E$<br>$D_{2h}$ | $D_{2h} +$<br>$D_{2h} \rightarrow O_h$ | $\Delta E$<br>$O_h$ |
|----------------------------|-------------------------------------------|----------------------------------|------------------------------|-------------------------------------|------------------------|----------------------------------------|---------------------|
| $\Delta E_{\text{int}}$    | -20.7                                     | -39.8                            | 19.1                         | -21.2                               | -0.5                   | -32.8                                  | 7.0                 |
| $\Delta E_{\text{Pauli}}$  | 225.7                                     | 348.0                            | -122.3                       | 230.3                               | 4.6                    | 338.1                                  | -9.9                |
| $\Delta V_{\text{elstat}}$ | -96.3                                     | -166.5                           | 70.2                         | -99.5                               | -3.2                   | -157.9                                 | 8.6                 |
| $\Delta E_{\text{oi}}$     | -146.9                                    | -217.4                           | 70.5                         | -149.3                              | -2.4                   | -213.8                                 | 3.6                 |
| $\Delta E_{\text{disp}}$   | -3.2                                      | -3.9                             | 0.7                          | -2.7                                | 0.5                    | 0.8                                    | 4.7                 |
| $\Delta E_{\text{prep}}$   | 0.0                                       | 1.7                              | -1.7                         | 1.7                                 | 1.7                    | 0.0                                    | -1.7                |
| $\Delta E$                 | -20.7                                     | -38.1                            | 17.4                         | -19.5                               | 1.2                    | -32.8                                  | 5.3                 |

**Table S4.** Energy decomposition analysis (EDA) of  $\text{Ga}_6^{2-}$  metal cluster with  $D_{2h}$  and  $O_h$  symmetries (in kcal mol<sup>-1</sup>), from two  $\text{Ga}_3^-$  fragments at their quintuplet state, computed at the BLYP-D3(BJ)/TZ2P level.

| $\text{Ga}_6^{2-}$         | $D_{2h} + D_{2h}$<br>$\rightarrow D_{2h}$ | $O_h + O_h$<br>$\rightarrow O_h$ | $\Delta E$<br>$D_{2h} - O_h$ | $O_h + O_h$<br>$\rightarrow D_{2h}$ | $\Delta E$<br>$D_{2h}$ | $D_{2h} +$<br>$D_{2h} \rightarrow O_h$ | $\Delta E$<br>$O_h$ |
|----------------------------|-------------------------------------------|----------------------------------|------------------------------|-------------------------------------|------------------------|----------------------------------------|---------------------|
| $\Delta E_{\text{int}}$    | -19.1                                     | -31.0                            | 11.9                         | -20.3                               | -1.2                   | -26.4                                  | 4.6                 |
| $\Delta E_{\text{Pauli}}$  | 269.6                                     | 384.5                            | -114.9                       | 278.2                               | 8.6                    | 372.8                                  | -11.8               |
| $\Delta V_{\text{elstat}}$ | -138.0                                    | -207.5                           | 69.5                         | -144.0                              | -6.0                   | -198.2                                 | 9.3                 |
| $\Delta E_{\text{oi}}$     | -146.7                                    | -203.4                           | 56.7                         | -150.6                              | -3.9                   | -199.2                                 | 4.2                 |
| $\Delta E_{\text{disp}}$   | -4.0                                      | -4.7                             | 0.6                          | -3.9                                | 0.1                    | -1.8                                   | 2.9                 |
| $\Delta E_{\text{prep}}$   | 0.1                                       | 1.4                              | -1.3                         | 1.4                                 | 1.3                    | 0.1                                    | -1.3                |
| $\Delta E$                 | -19.0                                     | -29.6                            | 10.6                         | -18.9                               | 0.1                    | -26.3                                  | 3.3                 |

**Table S5.** Energy decomposition analysis (EDA) of  $B_6^{2-}$  metal cluster with  $D_{2h}$  and  $O_h$  symmetries (in kcal mol<sup>-1</sup>), from two  $B_3^-$  fragments at their triplet state, computed at the BLYP-D3(BJ)/TZ2P level.

| $B_6^{2-}$                 | $D_{2h} + D_{2h}$<br>$\rightarrow D_{2h}$ | $O_h + O_h$<br>$\rightarrow O_h$ | $\Delta E$<br>$D_{2h} - O_h$ |
|----------------------------|-------------------------------------------|----------------------------------|------------------------------|
| $\Delta E_{\text{int}}$    | -84.9                                     | -50.5                            | -34.4                        |
| $\Delta E_{\text{Pauli}}$  | 451.8                                     | 1169.5                           | -717.7                       |
| $\Delta V_{\text{elstat}}$ | -180.9                                    | -447.6                           | 266.7                        |
| $\Delta E_{\text{oi}}$     | -352.7                                    | -770.4                           | 417.7                        |
| $\Delta E_{\text{disp}}$   | -3.2                                      | -2.1                             | -1.1                         |
| $\Delta E_{\text{prep}}$   | 0.2                                       | 11.8                             | -11.7                        |
| $\Delta E$                 | -84.8                                     | -38.7                            | -46.1                        |
